# Supplementary material
Source: Research Square preprint supplement (doi:10.21203/rs.3.rs-9381602/v1)
Supplement: Supplementary file 1 [file 031c90f0846572b02a354a7b.pdf]

# Supplementary Information

## **A Comb-Shaped, Silicone-Scaffolded Hydrogel Electrode for Stable Overnight EEG Acquisition in Assistive BCI Applications**

Wanwan Liu<sup>1</sup>, Chunrong Wei<sup>1\*</sup>, Hongyu Jiang<sup>1</sup>, Yan Zhu<sup>1</sup>, Keming Wang<sup>2</sup>, Weihua Pei<sup>3\*</sup>, Xiaoting Wu<sup>4</sup>, Juexian Cao<sup>2</sup>, Xiaofeng Liu<sup>2</sup>, Yiwei Liu<sup>2</sup>, Gege Ming<sup>5</sup>, Yijun Wang<sup>3</sup> and Xiaorong Gao<sup>5</sup>

<sup>1</sup> School of Physics and Optoelectronics, Xiangtan University, Xiangtan 411105, China.

<sup>2</sup> Hunan Institute of Advanced Sensing and Information Technology, Xiangtan University, Xiangtan, 411105, China.

<sup>3</sup> State Key Laboratory of Integrated Optoelectronics, Institute of Semiconductors, Chinese Academy of Sciences, Beijing 100083, China.

<sup>4</sup> School of Computer Science and Artificial Intelligence, Shanxi Normal University, Taiyuan 030031, China.

<sup>5</sup> Department of Biomedical Engineering, School of Medicine, Tsinghua University, Beijing, 100084, China.

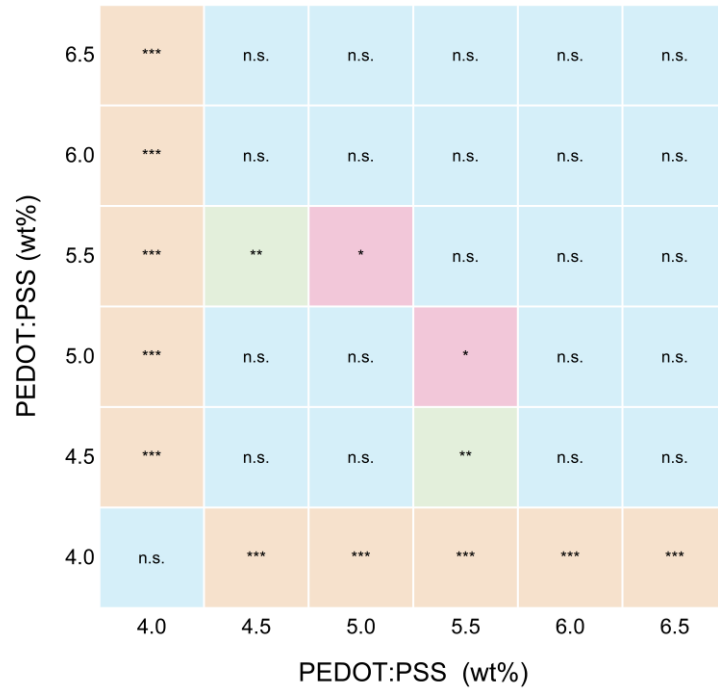

Fig. S1 Statistical comparison of impedance at 10 Hz for hydrogel formulations with different PEDOT:PSS concentrations (4.0-6.5 wt%).

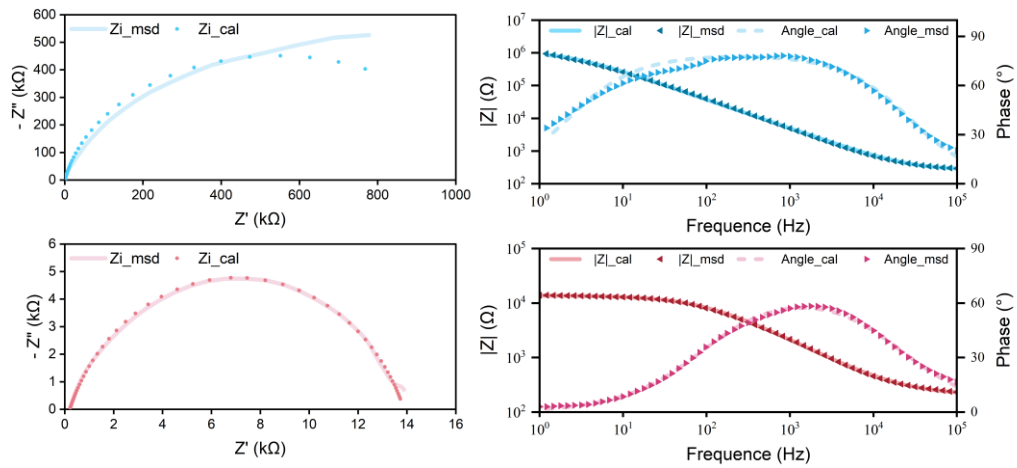

Fig. S2 Measured and fitted electrochemical impedance spectra of hydrogel electrodes without (blue) and with (red) PEDOT:PSS (5.5 wt%). Equivalent circuit fitting was performed using the R(QR) model.

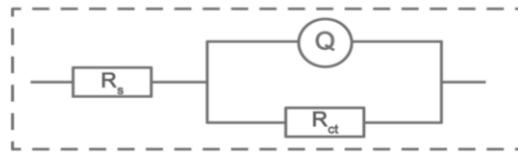

|          | 0.0 wt%<br>PEDOT:PSS | 5.5 wt%<br>PEDOT:PSS |
|----------|----------------------|----------------------|
| $R_s$    | 264.9                | 203.5                |
| $R_{ct}$ | 1.12E6               | 1.37E4               |
| $Y_0$    | 9.19E-09             | 5.25E-7              |
| $n$      | 0.88                 | 0.78                 |

Fig. S3 Charge transfer resistance ( $R_{ct}$ ) of hydrogels with different PEDOT:PSS concentrations.

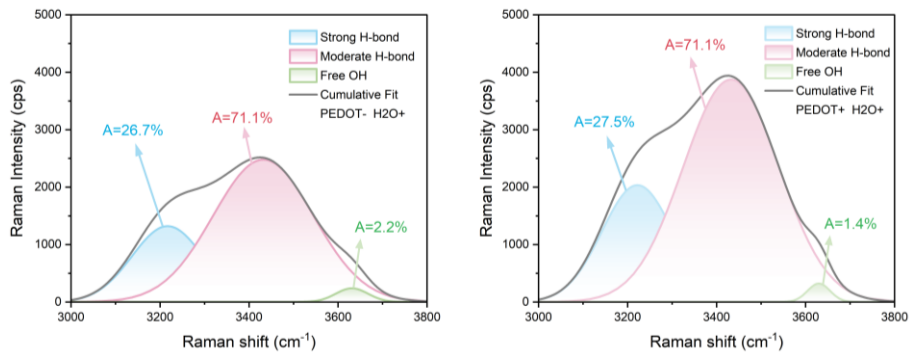

Fig. S4 Deconvolution of the O-H stretching band for hydrogels with and without PEDOT:PSS.

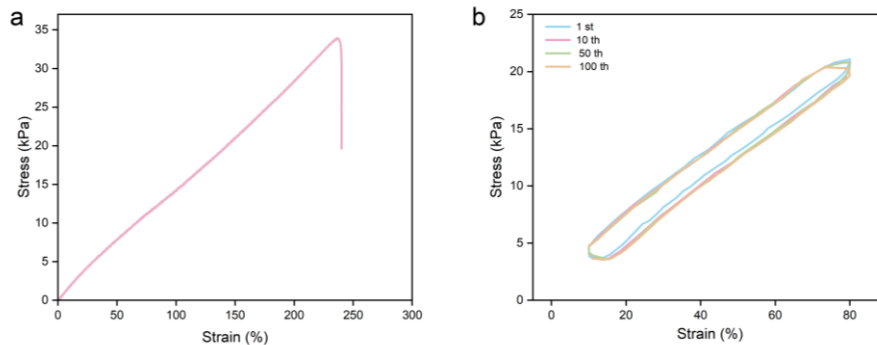

Fig. S5 Mechanical properties of the silicone scaffold (Ecoflex 00-30). (a) Stress-strain curve under uniaxial tensile loading. (b) Cyclic tensile loading-unloading curves over 100 cycles.

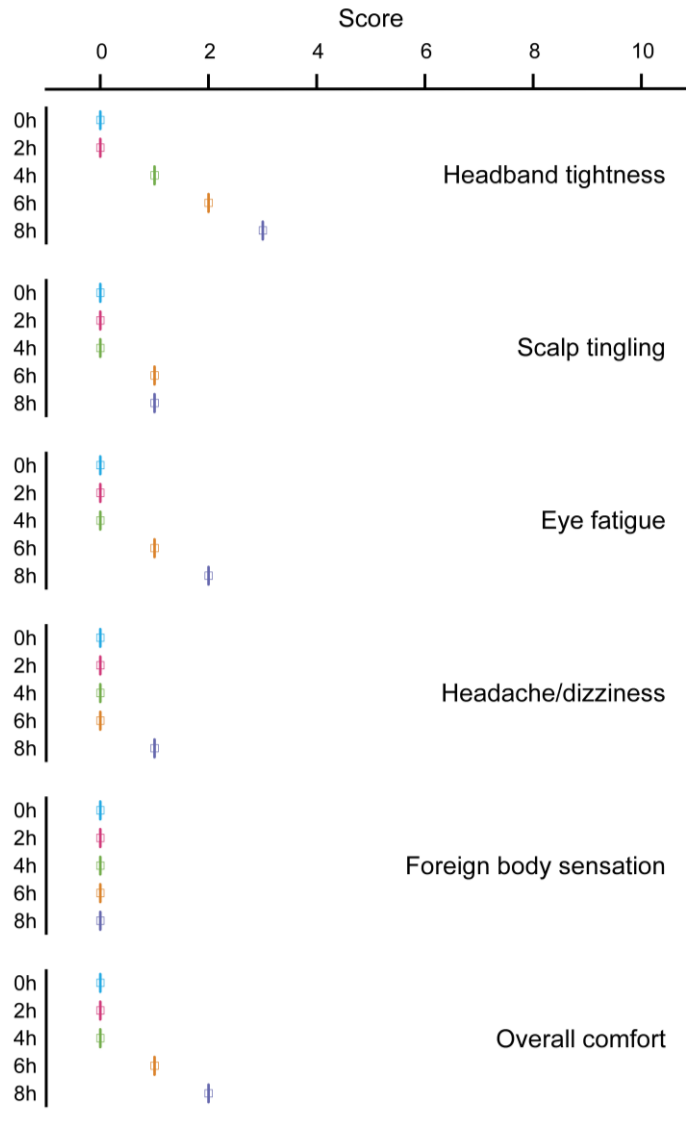

Fig. S6 Visual analog scale (VAS) scores for wearing comfort evaluation. The scores range from 0 to 10, where 0 indicates no discomfort, 1-3 mild discomfort, 4-6 moderate discomfort, 7-9 severe discomfort, and 10 extreme discomfort. The table shows the scores for headband tightness, scalp tingling, eye fatigue, headache/dizziness, foreign body sensation, and overall comfort at 0, 2, 4, 6, and 8 hours.
